# Supplementary material
Source: PubMed Central journal article supplement (PMC6093727)
Supplement: ba019224-suppl1.pdf [file ba019224-suppl1.pdf]

## SUPPLEMENTAL DATA

**Table S1.** Univariate analysis of prognostic variables associated with overall survival in treatment-naïve chronic myelomonocytic leukemia patients (n=449).

| Factor                          | Level                | Number<br>Total (died) | OS rate %<br>2:3:5 years | Median<br>OS time<br>(months) | Univariate<br>p-value | Hazard Ratio<br>(95% CI) | Overall<br>p-value | Log-rank<br>p-value |
|---------------------------------|----------------------|------------------------|--------------------------|-------------------------------|-----------------------|--------------------------|--------------------|---------------------|
| <b>Age in years<sup>1</sup></b> | Continuous<br>values | 499 (341)              | 54:39:20                 | 26.2                          | 0.0131                | 1.01(1.00,1.03)          | 0.0131             | 0.0131              |
|                                 | <60                  | 90 (49)                | 51:42:27                 | 24.3                          | 0.0273                | 0.71(0.52,0.96)          | 0.0273             | 0.0264              |
|                                 | >=60                 | 409 (292)              | 56:39:19                 | 26.2                          |                       | Ref                      |                    |                     |
|                                 | <70                  | 252 (159)              | 53:40:24                 | 26.2                          | 0.0381                | 0.80(0.64,0.99)          | 0.0381             | 0.0373              |
|                                 | >=70                 | 247 (182)              | 57:39:17                 | 26.2                          |                       | Ref                      |                    |                     |
|                                 | <60                  | 90 (49)                | 51:42:27                 | 24.3                          | 0.0134                | 0.67(0.48,0.92)          | 0.0420             | 0.0404              |
|                                 | >=60, <70            | 162 (110)              | 54:39:22                 | 26.2                          | 0.2336                | 0.87(0.68,1.10)          |                    |                     |
|                                 | >=70                 | 247 (182)              | 57:39:17                 | 26.2                          |                       | Ref                      |                    |                     |
| <b>Sex group</b>                |                      |                        |                          |                               |                       |                          |                    |                     |
|                                 | F                    | 160 (104)              | 60:47:23                 | 30.5                          | 0.1701                | 0.85(0.68,1.07)          | 0.1701             | 0.1695              |
|                                 | M                    | 339 (237)              | 53:36:19                 | 25.0                          |                       | Ref                      |                    |                     |
| <b>WHO 2008</b>                 |                      |                        |                          |                               |                       |                          |                    |                     |
|                                 | CMML-1               | 340 (222)              | 63:45:23                 | 30.5                          | 0.0003                | 0.66(0.53,0.83)          | 0.0003             | 0.0003              |
|                                 | CMML-2               | 159 (119)              | 38:28:15                 | 18.8                          |                       | Ref                      |                    |                     |
| <b>WHO 2017<sup>2</sup></b>     |                      |                        |                          |                               |                       |                          |                    |                     |
|                                 | CMML-0               | 177 (107)              | 66:50:28                 | 36.9                          | 0.0552                | 0.77(0.59,1.00)          | 0.0003             | 0.0002              |

| Factor                                     | Level    | Number<br>Total (died) | OS rate %<br>2:3:5 years | Median<br>OS time<br>(months) | Univariate<br>p-value | Hazard Ratio<br>(95% CI) | Overall<br>p-value | Log-rank<br>p-value |
|--------------------------------------------|----------|------------------------|--------------------------|-------------------------------|-----------------------|--------------------------|--------------------|---------------------|
|                                            | CMML-2   | 159 (119)              | 38:28:15                 | 18.8                          | 0.0323                | 1.33(1.02,1.72)          |                    |                     |
|                                            | CMML-1   | 163 (115)              | 60:40:17                 | 28.7                          |                       | Ref                      |                    |                     |
| <b>FAB subtype</b>                         |          |                        |                          |                               |                       |                          |                    |                     |
|                                            | MDS-CMML | 238 (138)              | 67:51:29                 | 36.9                          | <.0001                | 0.53(0.42,0.65)          | <.0001             | <.0001              |
|                                            | MP-CMML  | 261 (203)              | 44:29:13                 | 21.1                          |                       | Ref                      |                    |                     |
| <b>Peripheral blood parameters</b>         |          |                        |                          |                               |                       |                          |                    |                     |
| White blood count                          |          | 499 (341)              | 54:39:20                 | 26.2                          | <.0001                | 1.01(1.01,1.02)          | <.0001             | <.0001              |
| Absolute neutrophil count                  |          | 499 (341)              | 54:39:20                 | 26.2                          | <.0001                | 1.02(1.02,1.03)          | <.0001             | <.0001              |
| Immature myeloid cells                     |          | 499 (341)              | 54:39:20                 | 26.2                          | <.0001                | 1.04(1.03,1.05)          | <.0001             | <.0001              |
| Hemoglobin concentration                   |          | 499 (341)              | 54:39:20                 | 26.2                          | <.0001                | 0.84(0.79,0.88)          | <.0001             | <.0001              |
| Platelet count                             |          | 499 (341)              | 54:39:20                 | 26.2                          | 0.1116                | 1.00(1.00,1.00)          | 0.1116             | 0.1114              |
| Serum lactate<br>dehydrogenase             |          | 499 (341)              | 54:39:20                 | 26.2                          | <.0001                | 1.00(1.00,1.00)          | <.0001             | <.0001              |
| <b>BM blast percentage, median (range)</b> |          | 499 (341)              | 54:39:20                 | 26.2                          | 0.0303                | 1.02(1.00,1.05)          | 0.0303             | 0.0301              |
| <b>MDAPS</b>                               |          |                        |                          |                               |                       |                          |                    |                     |
|                                            | High     | 80 (64)                | 29:17: 9                 | 15.5                          | <.0001                | 3.66(2.34,5.72)          | <.0001             | <.0001              |
|                                            | INT-1    | 140 (86)               | 72:53:25                 | 38.0                          | 0.0433                | 1.55(1.01,2.38)          |                    |                     |
|                                            | INT-2    | 220 (163)              | 47:33:17                 | 23.0                          | <.0001                | 2.34(1.57,3.49)          |                    |                     |
|                                            | Low      | 59 (28)                | 81:64:36                 | 47.4                          |                       | Ref                      |                    |                     |
| <b>CPSS group</b>                          |          |                        |                          |                               |                       |                          |                    |                     |

| Factor                             | Level        | Number<br>Total (died) | OS rate %<br>2:3:5 years | Median<br>OS time<br>(months) | Univariate<br>p-value | Hazard Ratio<br>(95% CI) | Overall<br>p-value | Log-rank<br>p-value |
|------------------------------------|--------------|------------------------|--------------------------|-------------------------------|-----------------------|--------------------------|--------------------|---------------------|
|                                    | HIGH         | 45 (36)                | 15:12: 8                 | 11.6                          | <.0001                | 5.27(3.40,8.17)          | <.0001             | <.0001              |
|                                    | INT-1        | 150 (103)              | 68:47:23                 | 34.8                          | 0.0012                | 1.77(1.25,2.51)          |                    |                     |
|                                    | INT-2        | 204 (155)              | 41:25:11                 | 19.5                          | <.0001                | 3.01(2.17,4.19)          |                    |                     |
|                                    | Low          | 100 (47)               | 82:70:43                 | 49.3                          |                       | Ref                      |                    |                     |
| <b>CPSS cytogenetic risk group</b> |              |                        |                          |                               |                       |                          |                    |                     |
|                                    | High         | 80 (63)                | 24:14: 3                 | 16.0                          | <.0001                | 2.53(1.90,3.37)          | <.0001             | <.0001              |
|                                    | Intermediate | 64 (44)                | 56:33:18                 | 25.1                          | 0.1323                | 1.28(0.93,1.77)          |                    |                     |
|                                    | Low          | 355 (234)              | 62:46:24                 | 30.8                          |                       | Ref                      |                    |                     |
| <b>Tang cytogenetic risk group</b> |              |                        |                          |                               |                       |                          |                    |                     |
|                                    | High         | 53 (44)                | 13: 5: 0                 | 11.6                          | <.0001                | 3.85(2.75,5.39)          | <.0001             | <.0001              |
|                                    | Intermediate | 91 (63)                | 53:32:16                 | 24.9                          | 0.0444                | 1.33(1.01,1.76)          |                    |                     |
|                                    | Low          | 355 (234)              | 62:46:24                 | 30.8                          |                       | Ref                      |                    |                     |
| <b>Mutations</b>                   |              |                        |                          |                               |                       |                          |                    |                     |
| <i>TET2</i>                        | Absent       | 82 (33)                | 59:49:33                 | 29.2                          | 0.0111                | 2.36(1.22,4.59)          | 0.0111             | 0.0089              |
|                                    | Present      | 60 (16)                | 78:75:62                 | 83.5                          |                       | Ref                      |                    |                     |
| <i>ASXL1</i>                       | Absent       | 59 (16)                | 76:62:44                 | 47.4                          | 0.6358                | 0.84(0.41,1.73)          | 0.6358             | 0.6354              |
|                                    | Present      | 46 (15)                | 65:61:54                 | 83.5                          |                       | Ref                      |                    |                     |
| <i>RAS</i>                         | Absent       | 266 (166)              | 60:42:24                 | 29.2                          | 0.3179                | 0.87(0.66,1.15)          | 0.3179             | 0.3173              |
|                                    | Present      | 107 (70)               | 56:42:15                 | 26.2                          |                       | Ref                      |                    |                     |
| <i>TP53</i>                        | Absent       | 135 (46)               | 68:61:46                 | 49.7                          | 0.2801                | 0.52(0.16,1.70)          | 0.2801             | 0.2718              |

| Factor       | Level   | Number<br>Total (died) | OS rate %<br>2:3:5 years | Median<br>OS time<br>(months) | Univariate<br>p-value | Hazard Ratio<br>(95% CI) | Overall<br>p-value | Log-rank<br>p-value |
|--------------|---------|------------------------|--------------------------|-------------------------------|-----------------------|--------------------------|--------------------|---------------------|
|              | Present | 7 (3)                  | 34:NA:NA                 | 19.5                          |                       | Ref                      |                    |                     |
| <i>RUNX1</i> | Absent  | 88 (25)                | 72:61:50                 | 65.8                          | 0.8063                | 0.89(0.36,2.21)          | 0.8063             | 0.8063              |
|              | Present | 17 (6)                 | 65:65:49                 | 47.4                          |                       | Ref                      |                    |                     |

1: Age <60 vs. 60-70, p=0.1296 HR (95% CI): 0.77(0.55, 1.08)

2: CMML-0 vs. CMML-2 p<0.0001 with HR (95%CI):0.58(0.45, 0.76)

Abbreviations: CMML: chronic myelomonocytic leukemia, WHO: World Health Organization; FAB: French-American-British classification; MDS: myelodysplastic; MP: myeloproliferative; CPSS: CMML-specific Prognostic Scoring System; FAB: French-American-British group; AML: acute myeloid leukemia.

**Table S2A.** Multivariate analysis for overall survival in treatment-naïve MP-CMML patients, WHO 2017 blast-based subgroups.

| Variable                     | P-value | HR    | 95% CI for HR |       |
|------------------------------|---------|-------|---------------|-------|
| WHO 2017*                    |         |       |               |       |
| CMML-0 vs. CMML-1            | 0.0102  | 0.626 | 0.437         | 0.895 |
| CMML-2 vs. CMML-1            | 0.5140  | 1.116 | 0.803         | 1.551 |
| CMML-0 vs. CMML-2            | 0.0011  | 0.561 | 0.396         | 0.793 |
| Hemoglobin concentration     | <0.0001 | 0.879 | 0.824         | 0.938 |
| CPSS cytogenetic risk group* |         |       |               |       |
| High vs. Low                 | <0.0001 | 2.301 | 1.516         | 3.491 |
| Intermediate vs. Low         | 0.2837  | 1.237 | 0.838         | 1.827 |

\*Overall p-value <0.05

**Table S2A.** Multivariate analysis for overall survival in treatment-naïve MDS-CMML patients, WHO 2017 blast-based subgroups.

| Variable                     | P-value | HR    | 95% CI for HR |       |
|------------------------------|---------|-------|---------------|-------|
| Hemoglobin concentration     | <0.0001 | 0.818 | 0.749         | 0.893 |
| Age (<70 vs. ≥70)            | 0.0112  | 0.631 | 0.443         | 0.901 |
| CPSS cytogenetic risk group* |         |       |               |       |
| High vs. Low                 | <0.0001 | 2.743 | 1.799         | 4.183 |
| Intermediate vs. Low         | 0.8758  | 0.952 | 0.511         | 1.771 |

\*Overall p-value <0.05

**Table S3A.** Modified\* CPSS risk groups including CMML-0 subgroup.

| Risk Group     | Overall Score |
|----------------|---------------|
| Low            | 0-1           |
| Intermediate-1 | 2-3           |
| Intermediate-2 | 4-5           |
| High           | 6             |

\*Modified from reference #2 in main manuscript; "WHO subtype" variable scores assigned as follows: CMML-0=0; CMML-1=1; CMML-2=2

**Table S3B.** Pairwise comparison between modified CPSS risk groups using Cox proportional hazards model.

| Parameter                         | p-value | Hazard Ratio | 95% Hazard Ratio Confidence Limits |        |
|-----------------------------------|---------|--------------|------------------------------------|--------|
| High vs. Low                      | <.0001  | 8.086        | 4.486                              | 14.577 |
| Intermediate-1 vs. Low            | <.0001  | 1.817        | 1.438                              | 2.297  |
| Intermediate-2 vs. Low            | <.0001  | 3.731        | 2.824                              | 4.930  |
| High vs. Intermediate-1           | <.0001  | 4.450        | 2.514                              | 7.874  |
| Intermediate-2 vs. Intermediate-1 | <.0001  | 2.053        | 1.614                              | 2.612  |
| High vs. Intermediate-2           | 0.0091  | 2.167        | 1.212                              | 3.876  |

Figure S1.

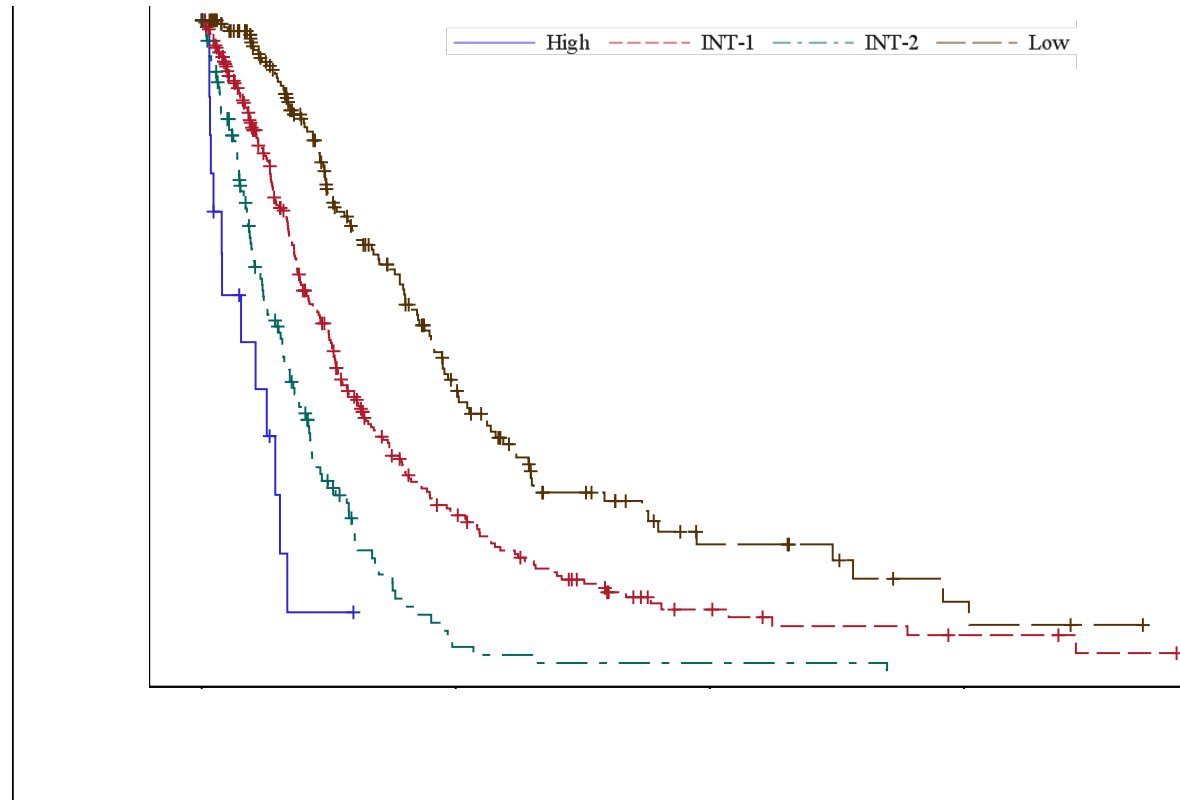

**Figure S1.** Kaplan-Meier plots demonstrating distinct differences in overall survival between patients stratified according to the modified CPSS scheme based on new score sums that include three-tiered blast-based CMML subgroups per WHO 2017 scheme. ( $p < 0.0001$ ; Log-rank)
